# Supplementary material for: Mechanical thrombectomy in patients with cervical artery dissection and stroke in the anterior or posterior circulation – a multicenter analysis from the German Stroke Registry
Source: PubMed Central journal article supplement (PMC8091690; doi:10.1186/s42466-021-00119-y), 2021-05-03
Supplement: 42466_2021_119_MOESM1_ESM.pdf [file 42466_2021_119_MOESM1_ESM.pdf]

# SUPPLEMENTAL MATERIAL

## **Mechanical Thrombectomy in Patients with Cervical Artery Dissection and Stroke in the Anterior or Posterior Circulation**

**– A Multicenter Analysis from the German Stroke Registry**

Ludwig Schlemm, Regina von Rennenberg, Eberhard Siebert, Georg Bohner, Fabian Flottmann,  
Gabor C. Petzold, Götz Thomalla, Matthias Endres, Christian H. Nolte  
for the GSR-ET investigators

|                                                                                                                                         |   |
|-----------------------------------------------------------------------------------------------------------------------------------------|---|
| <b>Supplemental Table I</b> Baseline characteristics in subgroups of patients with anterior or posterior circulation occlusion. ....    | 2 |
| <b>Supplemental Table II</b> Procedural characteristics in subgroups of patients with anterior or posterior circulation occlusion. .... | 3 |
| <b>Supplemental Table III</b> Reperfusion outcomes in subgroups of patients with anterior or posterior circulation occlusion. ....      | 3 |
| <b>Supplemental table IV</b> Adverse events in subgroups of patients with anterior or posterior circulation occlusion. ....             | 4 |
| <b>Supplemental Table V</b> Functional outcome in subgroups of patients with anterior or posterior circulation occlusion. ....          | 5 |

| Supplemental Table 1 Baseline characteristics in subgroups of patients with anterior or posterior circulation occlusion. |                                                                 |                     |             |                                                                  |                    |              |                                |
|--------------------------------------------------------------------------------------------------------------------------|-----------------------------------------------------------------|---------------------|-------------|------------------------------------------------------------------|--------------------|--------------|--------------------------------|
|                                                                                                                          | Patients with occlusion in a vessel of the anterior circulation |                     |             | Patients with occlusion in a vessel of the posterior circulation |                    |              | CAD-Patients<br>P <sup>a</sup> |
|                                                                                                                          | No CAD<br>n=2,207                                               | CAD<br>n=45         | P           | No CAD<br>n=283                                                  | CAD<br>n=17        | P            |                                |
| <b>Demographic</b>                                                                                                       |                                                                 |                     |             |                                                                  |                    |              |                                |
| Age – years, median (IQR), n                                                                                             | 76 (65-82), n=2207                                              | 51 (48-56), n=45    | .001        | 75 (65-81), n=283                                                | 46 (36-57), n=17   | .001         | .305                           |
| Female, % (n)                                                                                                            | 52.4% (1157)                                                    | 20.0% (9)           | .001        | 40.3% (114)                                                      | 41.2% (7)          | 1.000        | .111                           |
| Pre-stroke mRS, % (n)                                                                                                    |                                                                 |                     |             |                                                                  |                    |              |                                |
| 0                                                                                                                        | 68.0% (1443)                                                    | 93.3% (42)          |             | 69.0% (189)                                                      | 100.0% (17)        |              |                                |
| 1                                                                                                                        | 12.6% (268)                                                     | 0% (0)              |             | 14.2% (39)                                                       | 0.0% (0)           |              |                                |
| 2                                                                                                                        | 8.3% (177)                                                      | 4.4% (2)            | .002        | 6.9% (19)                                                        | 0.0% (0)           | <sup>b</sup> | <sup>b</sup>                   |
| 3                                                                                                                        | 6.2% (131)                                                      | 2.2% (1)            |             | 4.0% (11)                                                        | 0.0% (0)           |              |                                |
| 4                                                                                                                        | 3.4% (72)                                                       | 0% (0)              |             | 4.4% (12)                                                        | 0.0% (0)           |              |                                |
| 5                                                                                                                        | 1.5% (31)                                                       | 0% (0)              |             | 1.5% (4)                                                         | 0.0% (0)           |              |                                |
| Current smoking, % (n)                                                                                                   | 15.4% (298)                                                     | 23.8% (10)          | .335        | 13.0% (32)                                                       | 25.0% (3)          | .301         | .635                           |
| <b>Clinical</b>                                                                                                          |                                                                 |                     |             |                                                                  |                    |              |                                |
| NIHSS, median (IQR)                                                                                                      | 15 (10-18), n=2,207                                             | 14 (7-16), n=45     | .100        | 15 (7-26), n=283                                                 | 13 (5-26), n=17    | .410         | .967                           |
| Medical history, % (n)                                                                                                   |                                                                 |                     |             |                                                                  |                    |              |                                |
| Hypertension                                                                                                             | 76.3% (1,672)                                                   | 26.7% (12)          | .001        | 79.4% (223)                                                      | 23.5% (4)          | .001         | 1.000                          |
| Diabetes mellitus                                                                                                        | 21.4% (470)                                                     | 4.4% (2)            | .003        | 20.7% (58)                                                       | 5.9% (1)           | .210         | 1.000                          |
| Dyslipidemia                                                                                                             | 34.2% (747)                                                     | 22.2% (10)          | .112        | 33.3% (93)                                                       | 5.9% (1)           | .016         | .262                           |
| Atrial fibrillation                                                                                                      | 42.8% (935)                                                     | 2.2% (1)            | .001        | 34.5% (97)                                                       | 0.0% (0)           | .002         | 1.000                          |
| Medication, % (n)                                                                                                        |                                                                 |                     |             |                                                                  |                    |              |                                |
| Antiplatelet                                                                                                             | 32.4% (697)                                                     | 15.6% (7)           | .015        | 41.4% (111)                                                      | 23.5% (4)          | .203         | .475                           |
| Anticoagulation                                                                                                          | 21.5% (462)                                                     | 0.0% (0)            | .001        | 16.8% (45)                                                       | 5.9% (1)           | .325         | .274                           |
| Etiology, % (n)                                                                                                          |                                                                 |                     |             |                                                                  |                    |              |                                |
| Cardioembolism                                                                                                           | 53.1% (1,171)                                                   | -                   |             | 41.0% (116)                                                      | -                  |              |                                |
| Dissection                                                                                                               | -                                                               | 100.0% (45)         |             | -                                                                | 100.0% (17)        |              |                                |
| Large-artery atherosclerosis                                                                                             | 25.1% (553)                                                     | -                   |             | 33.2% (94)                                                       | -                  |              |                                |
| Small-vessel occlusion                                                                                                   | 0.0% (1)                                                        | -                   |             | 0.0% (0)                                                         | -                  |              |                                |
| Stroke of other determined etiology                                                                                      | 4.3% (96)                                                       | -                   |             | 7.4% (21)                                                        | -                  |              |                                |
| Stroke of undetermined etiology                                                                                          | 17.5% (386)                                                     | -                   |             | 18.4% (52)                                                       | -                  |              |                                |
| Direct-to-center, % (n)                                                                                                  | 52% (1,140)                                                     | 58% (26)            | .454        | 53.7% (152)                                                      | 47.1% (8)          | .625         | .570                           |
| Symptom onset known, % (n)                                                                                               | 61.8% (1,365)                                                   | 73.3% (33)          | .123        | 58.0% (164)                                                      | 76.5% (13)         | .203         | 1.000                          |
| Time from symptom onset to admission – min, median (IQR), n                                                              | 128 (59-203), n=1,365                                           | 87 (54-171), n=33   | .120        | 127 (60-243), n=164                                              | 262 (63-356), n=13 | .177         | .032                           |
| Time from last-seen-well to admission – min, median (IQR), n                                                             | 346 (201-676), n=842                                            | 267 (195-331), n=12 | .181        | 475 (301-780), n=119                                             | 348 (270-426), n=4 | .422         | .485                           |
| <b>Radiological</b>                                                                                                      |                                                                 |                     |             |                                                                  |                    |              |                                |
| ASPECTS, median (IQR)                                                                                                    | 9 (7-10), n=1,904                                               | 8 (6-10), n=37      | .029        | -                                                                | -                  | -            | - <sup>a</sup>                 |
| Occluded vessel, % (n)                                                                                                   |                                                                 |                     |             |                                                                  |                    |              |                                |
| ICA                                                                                                                      | 27.5% (607)                                                     | 62.2% (28)          | .001        | -                                                                | -                  | -            | -                              |
| MCA, M1                                                                                                                  | 63.9% (1,410)                                                   | 40.0% (18)          | .002        | -                                                                | -                  | -            | -                              |
| MCA, M2                                                                                                                  | 20.0% (441)                                                     | 26.7% (12)          | .262        | -                                                                | -                  | -            | -                              |
| ACA                                                                                                                      | 2.8% (61)                                                       | 0.0% (0)            | .633        | -                                                                | -                  | -            | -                              |
| BA                                                                                                                       | -                                                               | -                   | -           | 88.3% (250)                                                      | 70.6% (12)         | .049         | -                              |
| VA                                                                                                                       | -                                                               | -                   | -           | 13.4% (38)                                                       | 64.7% (11)         | .001         | -                              |
| PCA                                                                                                                      | -                                                               | -                   | -           | 15.9% (45)                                                       | 5.9% (1)           | .486         | -                              |
| mTICI before thrombectomy, % (n)                                                                                         |                                                                 |                     |             |                                                                  |                    |              |                                |
| 0                                                                                                                        | 86.6% (1,845)                                                   | 90.7% (39)          |             | 81.5% (221)                                                      | 76.5% (13)         |              |                                |
| 1                                                                                                                        | 4.4% (93)                                                       | 4.7% (2)            |             | 7.7% (21)                                                        | 5.9% (1)           |              |                                |
| 2a                                                                                                                       | 2.1% (44)                                                       | 2.3% (1)            | .416        | 2.2% (6)                                                         | 0.0% (0)           |              | .139                           |
| 2b                                                                                                                       | 3.2% (68)                                                       | 0.0% (0)            |             | 2.2% (6)                                                         | 17.6% (3)          |              |                                |
| 3                                                                                                                        | 3.8% (81)                                                       | 2.3% (1)            |             | 6.3% (17)                                                        | 0.0% (0)           |              |                                |
| 86.6% (1845)                                                                                                             | 90.7% (39)                                                      |                     | 81.5% (221) | 76.5% (13)                                                       |                    |              |                                |
| Extracranial ICA stenosis (>70%) ipsilateral to intracranial vessel occlusion, % (n/n)                                   | 15.7% (327)                                                     | 61.4% (27)          | .001        | 0.8% (2)                                                         | 6.3% (1)           | .161         | .001                           |

<sup>a</sup> P-value for comparing patients with CAD and an occlusion in a vessel of the anterior circulation to patients with CAD and an occlusion in a vessel of the posterior circulation. <sup>b</sup> P value cannot be estimated due to singularities in the Fisher information matrix.

CAD stands for cervical artery dissection; IQR, interquartile range; mRS, modified Rankin scale; NIHSS, National Institutes of Health Stroke Scale; ASPECTS, Alberta Stroke Program Early CT Score; ICA, internal carotid artery; ACA, anterior cerebral artery; BA, basilar artery; VA, vertebral artery; PCA, posterior cerebral artery; mTICI, modified Treatment in Cerebral Infarction.

| Supplemental Table II Procedural characteristics in subgroups of patients with anterior or posterior circulation occlusion.                                                                                                                                                                                                                                                                                 |                                                                 |                     |      |                                                                  |                     |      |                                |
|-------------------------------------------------------------------------------------------------------------------------------------------------------------------------------------------------------------------------------------------------------------------------------------------------------------------------------------------------------------------------------------------------------------|-----------------------------------------------------------------|---------------------|------|------------------------------------------------------------------|---------------------|------|--------------------------------|
|                                                                                                                                                                                                                                                                                                                                                                                                             | Patients with occlusion in a vessel of the anterior circulation |                     |      | Patients with occlusion in a vessel of the posterior circulation |                     |      | CAD-Patients<br>P <sup>a</sup> |
|                                                                                                                                                                                                                                                                                                                                                                                                             | No CAD<br>n=2,207                                               | CAD<br>n=45         | P    | No CAD<br>n=283                                                  | CAD<br>n=17         | P    |                                |
| <b>Intervention</b>                                                                                                                                                                                                                                                                                                                                                                                         |                                                                 |                     |      |                                                                  |                     |      |                                |
| Treatment with intravenous thrombolysis, % (n)                                                                                                                                                                                                                                                                                                                                                              | 56% (1231)                                                      | 80% (36)            | .001 | 49.3% (139)                                                      | 35.3% (6)           | .322 | .001                           |
| <b>Anesthesia, % (n)</b>                                                                                                                                                                                                                                                                                                                                                                                    |                                                                 |                     |      |                                                                  |                     |      |                                |
| Conscious sedation                                                                                                                                                                                                                                                                                                                                                                                          | 32.8% (696)                                                     | 28.9% (13)          | .555 | 2.9% (8)                                                         | 0.0% (0)            | .256 | .017                           |
| Beginning with conscious sedation, switch to general anesthesia                                                                                                                                                                                                                                                                                                                                             | 3.8% (80)                                                       | 6.7% (3)            |      | 11.0% (30)                                                       | 0.0% (0)            |      |                                |
| Primary general anesthesia                                                                                                                                                                                                                                                                                                                                                                                  | 63.4% (1,346)                                                   | 64.4% (29)          |      | 86.1% (235)                                                      | 100% (17)           |      |                                |
| Number of passages, median (IQR), n                                                                                                                                                                                                                                                                                                                                                                         | 2 (1-3), n=2,207                                                | 2 (1-3), n=5        | .578 | 1 (1-2), n=283                                                   | 3 (1-4), n=17       | .171 | .797                           |
| Intra-arterial medication, % (n)                                                                                                                                                                                                                                                                                                                                                                            | 14.9% (322)                                                     | 34.1% (15)          | .002 | 22.2% (61)                                                       | 35.3% (6)           | .236 | 1.000                          |
| Additional heparin bolus given, % (n)                                                                                                                                                                                                                                                                                                                                                                       | 13.0% (258)                                                     | 28.6% (12)          | .009 | 16.1% (42)                                                       | 23.5% (4)           | .496 | .759                           |
| Stenting of >70% ipsilateral extracranial ICA stenosis (if present), % (n)                                                                                                                                                                                                                                                                                                                                  | 69.7% (228)                                                     | 63.0% (17)          | .391 | 0.0% (0)                                                         | 100.0% (1)          | .333 | 1.000                          |
| <b>Time intervals</b>                                                                                                                                                                                                                                                                                                                                                                                       |                                                                 |                     |      |                                                                  |                     |      |                                |
| <b>Known symptom onset – min, median (IQR), n</b>                                                                                                                                                                                                                                                                                                                                                           |                                                                 |                     |      |                                                                  |                     |      |                                |
| Time from symptom onset to flow restoration                                                                                                                                                                                                                                                                                                                                                                 | 245 (188-320), n=1,365                                          | 313 (233-422), n=33 | .002 | 280 (200-350), n=164                                             | 395 (233-444), n=13 | .203 | .566                           |
| <b>Unknown symptom onset – min, median (IQR), n</b>                                                                                                                                                                                                                                                                                                                                                         |                                                                 |                     |      |                                                                  |                     |      |                                |
| Time from last-seen-well to flow restoration                                                                                                                                                                                                                                                                                                                                                                | 512 (350-817), n=842                                            | 463 (372-480), n=12 | .654 | 625 (464-949), n=119                                             | 568 (568-568), n=4  | .881 | .500                           |
| <b>Known and unknown symptom onset – min, median (IQR), n</b>                                                                                                                                                                                                                                                                                                                                               |                                                                 |                     |      |                                                                  |                     |      |                                |
| Time from admission to i.v. thrombolysis                                                                                                                                                                                                                                                                                                                                                                    | 21 (-77-34), n= 2207                                            | 17 (-67-28), n=45   | .757 | 28 (-75-42), n=283                                               | -34 (-195-58), n=17 | .467 | .662                           |
| Time from admission to groin puncture                                                                                                                                                                                                                                                                                                                                                                       | 70 (46-101), n=2,207                                            | 80 (56-114), n=45   | .130 | 78 (53-122), n=283                                               | 98 (75-129), n=17   | .168 | .225                           |
| Time from groin puncture to flow restoration                                                                                                                                                                                                                                                                                                                                                                | 69 (45-97), n=2,207                                             | 95 (61-136), n=45   | .005 | 75 (53-113), n=283                                               | 101 (82-152), n=17  | .051 | .382                           |
| <sup>a</sup> P-value for comparing patients with CAD and an occlusion in a vessel of the anterior circulation to patients with CAD and an occlusion in a vessel of the posterior circulation. <sup>b</sup> No P-value estimated due to low numbers.<br>CAD stands for cervical artery dissection; IQR, interquartile range; ICA, internal carotid artery; mTICI, modified Treatment in Cerebral Infarction. |                                                                 |                     |      |                                                                  |                     |      |                                |

| Supplemental Table III Reperfusion outcomes in subgroups of patients with anterior or posterior circulation occlusion.                                                                                                                                                                        |                   |             |      |                                                                 |             |      |                                                                  |             |      |                                |
|-----------------------------------------------------------------------------------------------------------------------------------------------------------------------------------------------------------------------------------------------------------------------------------------------|-------------------|-------------|------|-----------------------------------------------------------------|-------------|------|------------------------------------------------------------------|-------------|------|--------------------------------|
|                                                                                                                                                                                                                                                                                               | All patients      |             |      | Patients with occlusion in a vessel of the anterior circulation |             |      | Patients with occlusion in a vessel of the posterior circulation |             |      | CAD-Patients<br>P <sup>a</sup> |
|                                                                                                                                                                                                                                                                                               | No CAD<br>n=2,527 | CAD<br>n=62 | P    | No CAD<br>n=2,207                                               | CAD<br>n=45 | P    | No CAD<br>n=283                                                  | CAD<br>n=17 | P    |                                |
| <b>mTICI after thrombectomy, % (n)</b>                                                                                                                                                                                                                                                        |                   |             |      |                                                                 |             |      |                                                                  |             |      |                                |
| 0                                                                                                                                                                                                                                                                                             | 9.0% (224)        | 4.9% (3)    | .116 | 8.7% (189)                                                      | 6.8% (3)    | .125 | 10.2% (28)                                                       | 0.0% (0)    | .207 | .449                           |
| 1                                                                                                                                                                                                                                                                                             | 1.9% (48)         | 0.0% (0)    |      | 1.8% (39)                                                       | 0.0% (0)    |      | 2.9% (8)                                                         | 0.0% (0)    |      |                                |
| 2a                                                                                                                                                                                                                                                                                            | 5.7% (141)        | 9.8% (6)    |      | 5.9% (129)                                                      | 13.6% (6)   |      | 3.3% (9)                                                         | 0.0% (0)    |      |                                |
| 2b                                                                                                                                                                                                                                                                                            | 35.6% (881)       | 54.1% (33)  |      | 37.3% (809)                                                     | 47.7% (21)  |      | 22.2% (61)                                                       | 70.6% (12)  |      |                                |
| 3                                                                                                                                                                                                                                                                                             | 47.7% (1182)      | 31.1% (19)  |      | 46.3% (1004)                                                    | 31.8% (14)  |      | 61.5% (169)                                                      | 29.4% (5)   |      |                                |
| <sup>a</sup> P-value for comparing patients with CAD and an occlusion in a vessel of the anterior circulation to patients with CAD and an occlusion in a vessel of the posterior circulation.<br>CAD stands for cervical artery dissection; mTICI, modified Treatment in Cerebral Infarction. |                   |             |      |                                                                 |             |      |                                                                  |             |      |                                |

| <b>Supplemental table IV</b> Adverse events in subgroups of patients with anterior or posterior circulation occlusion. |                                                                        |                     |                |                                                                         |                     |                |                      |
|------------------------------------------------------------------------------------------------------------------------|------------------------------------------------------------------------|---------------------|----------------|-------------------------------------------------------------------------|---------------------|----------------|----------------------|
|                                                                                                                        | <b>Patients with occlusion in a vessel of the anterior circulation</b> |                     |                | <b>Patients with occlusion in a vessel of the posterior circulation</b> |                     |                | <b>CAD-Patients</b>  |
|                                                                                                                        | <b>No CAD<br/>n=2,207</b>                                              | <b>CAD<br/>n=45</b> | <b>P</b>       | <b>No CAD<br/>n=283</b>                                                 | <b>CAD<br/>n=17</b> | <b>P</b>       | <b>P<sup>a</sup></b> |
| Any adverse events, % (n)                                                                                              | 13.4% (294)                                                            | 13.3% (6)           | 1.000          | 12.5% (35)                                                              | 11.8% (2)           | 1.000          | 1.000                |
| Device malfunction                                                                                                     | 0.3% (7)                                                               | 0.0% (0)            | . <sup>b</sup> | 0.4% (1)                                                                | 0.0% (0)            | . <sup>b</sup> | . <sup>b</sup>       |
| Dissection/perforation                                                                                                 | 2.8% (61)                                                              | 4.4% (2)            | . <sup>b</sup> | 3.2% (9)                                                                | 5.9% (1)            | . <sup>b</sup> | . <sup>b</sup>       |
| Clot migration/embolism                                                                                                | 3.2% (70)                                                              | 6.7% (3)            | . <sup>b</sup> | 2.1% (6)                                                                | 0.0% (0)            | . <sup>b</sup> | . <sup>b</sup>       |
| Intracerebral hemorrhage                                                                                               | 2.3% (51)                                                              | 0.0% (0)            | . <sup>b</sup> | 1.4% (4)                                                                | 0.0% (0)            | . <sup>b</sup> | . <sup>b</sup>       |
| Vasospasm                                                                                                              | 2.8% (62)                                                              | 4.4% (2)            | . <sup>b</sup> | 1.1% (3)                                                                | 5.9% (1)            | . <sup>b</sup> | . <sup>b</sup>       |
| Stroke                                                                                                                 | 0.0% (1)                                                               | 2.2% (1)            | . <sup>b</sup> | 0.0% (0)                                                                | 0.0% (0)            | . <sup>b</sup> | . <sup>b</sup>       |
| New persistent neurological deficit                                                                                    | 0.1% (2)                                                               | 0.0% (0)            | . <sup>b</sup> | 0.0% (0)                                                                | 0.0% (0)            | . <sup>b</sup> | . <sup>b</sup>       |
| New transient neurological deficit                                                                                     | 0.0% (1)                                                               | 0.0% (0)            | . <sup>b</sup> | 0.0% (0)                                                                | 0.0% (0)            | . <sup>b</sup> | . <sup>b</sup>       |

<sup>a</sup> P-value for comparing patients with CAD and an occlusion in a vessel of the anterior circulation to patients with CAD and an occlusion in a vessel of the posterior circulation. <sup>b</sup> No P-value estimated due to low numbers.  
CAD stands for cervical artery dissection.

| <b>Supplemental Table V</b> Functional outcome in subgroups of patients with anterior or posterior circulation occlusion. |                                                                        |                     |                              |                                                                         |                     |                              |                                                                            |
|---------------------------------------------------------------------------------------------------------------------------|------------------------------------------------------------------------|---------------------|------------------------------|-------------------------------------------------------------------------|---------------------|------------------------------|----------------------------------------------------------------------------|
|                                                                                                                           | <b>Patients with occlusion in a vessel of the anterior circulation</b> |                     |                              | <b>Patients with occlusion in a vessel of the posterior circulation</b> |                     |                              | <b>Patients with CAD<br/>P<sup>a</sup><br/>P<sub>adj</sub><sup>a</sup></b> |
|                                                                                                                           | <b>No CAD<br/>n=2,207</b>                                              | <b>CAD<br/>n=45</b> | <b>P<br/>P<sub>adj</sub></b> | <b>No CAD<br/>n=283</b>                                                 | <b>CAD<br/>n=17</b> | <b>P<br/>P<sub>adj</sub></b> |                                                                            |
| <b>After 24 hours</b>                                                                                                     |                                                                        |                     |                              |                                                                         |                     |                              |                                                                            |
| NIHSS after 24 hours, median (IQR)                                                                                        | 10 (4-19), n=2,207                                                     | 9 (4-17), n=45      | .418<br>.494 <sup>b</sup>    | 9 (3-30), n=283                                                         | 3 (1-5), n=17       | .002<br>.942 <sup>b</sup>    | .010<br>.969 <sup>b</sup>                                                  |
| mRS score after 24 hours, % (n)                                                                                           |                                                                        |                     |                              |                                                                         |                     |                              |                                                                            |
| 0                                                                                                                         | 2.6% (49)                                                              | 5.0% (2)            |                              | 3.8% (9)                                                                | 23.5% (4)           |                              |                                                                            |
| 1                                                                                                                         | 5.8% (110)                                                             | 12.5% (5)           |                              | 9.6% (23)                                                               | 11.8% (2)           |                              |                                                                            |
| 2                                                                                                                         | 8.7% (166)                                                             | 10.0% (4)           | .032                         | 9.6% (23)                                                               | 0.0% (0)            | .242                         | .974                                                                       |
| 3                                                                                                                         | 13.5% (258)                                                            | 17.5% (7)           | .634 <sup>b</sup>            | 10.5% (25)                                                              | 5.9% (1)            | .294                         | .996 <sup>b</sup>                                                          |
| 4                                                                                                                         | 18.6% (355)                                                            | 17.5% (7)           |                              | 13.0% (31)                                                              | 5.9% (1)            |                              |                                                                            |
| 5                                                                                                                         | 50.2% (957)                                                            | 37.5% (15)          |                              | 51.9% (124)                                                             | 52.9% (9)           |                              |                                                                            |
| 6                                                                                                                         | 0.6% (12)                                                              | 0.0% (0/40)         |                              | 1.7% (4)                                                                | 0.0% (0)            |                              |                                                                            |
| <b>At discharge</b>                                                                                                       |                                                                        |                     |                              |                                                                         |                     |                              |                                                                            |
| NIHSS at discharge, median (IQR)                                                                                          | 6 (2-13), n=2,207                                                      | 5 (0-11), n=45      | .210<br>.946 <sup>b</sup>    | 5 (1-12), n=283                                                         | 0 (0-3), n=17       | .002<br>.750                 | .018<br>.812 <sup>b</sup>                                                  |
| mRS score at discharge, % (n)                                                                                             |                                                                        |                     |                              |                                                                         |                     |                              |                                                                            |
| 0                                                                                                                         | 7.9% (170)                                                             | 11.6% (5)           |                              | 11.2% (31)                                                              | 41.2% (7)           |                              |                                                                            |
| 1                                                                                                                         | 12.1% (260)                                                            | 23.3% (10)          |                              | 11.9% (33)                                                              | 17.6% (3)           |                              |                                                                            |
| 2                                                                                                                         | 11.9% (255)                                                            | 9.3% (4)            | .008                         | 10.1% (28)                                                              | 11.8% (2)           | .001                         | .054                                                                       |
| 3                                                                                                                         | 14.0% (302)                                                            | 20.9% (9)           | .673 <sup>b</sup>            | 10.8% (30)                                                              | 5.9% (1)            | .868                         | .678 <sup>b</sup>                                                          |
| 4                                                                                                                         | 17.3% (371)                                                            | 14.0% (6)           |                              | 14.4% (40)                                                              | 0.0% (0)            |                              |                                                                            |
| 5                                                                                                                         | 21.7% (466)                                                            | 18.6% (8)           |                              | 21.3% (59)                                                              | 11.8% (2)           |                              |                                                                            |
| 6                                                                                                                         | 15.2% (326)                                                            | 2.3% (1)            |                              | 20.2% (56)                                                              | 11.8% (2)           |                              |                                                                            |
| <b>After 90 days</b>                                                                                                      |                                                                        |                     |                              |                                                                         |                     |                              |                                                                            |
| mRS score after 90 days, % (n/n)                                                                                          |                                                                        |                     |                              |                                                                         |                     |                              |                                                                            |
| 0                                                                                                                         | 11.7% (228)                                                            | 17.5% (7)           |                              | 12.4% (31)                                                              | 20.0% (3)           |                              |                                                                            |
| 1                                                                                                                         | 14.7% (285)                                                            | 32.5% (13)          |                              | 12.4% (31)                                                              | 33.3% (5)           |                              |                                                                            |
| 2                                                                                                                         | 10.4% (203)                                                            | 22.5% (9)           | .001                         | 10.8% (27)                                                              | 13.3% (2)           | .029                         | .901                                                                       |
| 3                                                                                                                         | 12.1% (236)                                                            | 5.0% (2)            | .548 <sup>b</sup>            | 12.4% (31)                                                              | 6.7% (1)            | .601                         | .122 <sup>b</sup>                                                          |
| 4                                                                                                                         | 13.4% (260)                                                            | 10.0% (4)           |                              | 8.4% (21)                                                               | 6.7% (1)            |                              |                                                                            |
| 5                                                                                                                         | 9.7% (189)                                                             | 10.0% (4)           |                              | 12.8% (32)                                                              | 6.7% (1)            |                              |                                                                            |
| 6                                                                                                                         | 27.9% (542)                                                            | 2.5% (1)            |                              | 30.8% (77)                                                              | 13.3% (2)           |                              |                                                                            |

<sup>a</sup> P-value for comparing patients with CAD and an occlusion in a vessel of the anterior circulation to patients with CAD and an occlusion in a vessel of the posterior circulation. <sup>b</sup> P-value adjusted for age, gender, pre-stroke modified Rankin scale score, medical history, prior medication, Alberta Stroke Program Early CT Score (only anterior circulation occlusions), and location of occluded vessel.  
CAD stands for cervical artery dissection; IQR, interquartile range; mRS, modified Rankin scale; NIHSS, National Institutes of Health Stroke Scale.
